# Supplementary material for: Fish community structure and diversity in the Ningxia section of the main stream of the Yellow River in China
Source: PeerJ. 2025 Dec 19;13:e20228. doi: 10.7717/peerj.20228 (PMC12721126; doi:10.7717/peerj.20228)
Supplement: Supplemental Information 1 [file peerj-13-20228-s001.xlsx]

## Sheet: 2023.2
Species	Number	Weight	F	F%	N%	W%	N%+W%*100	IRI			Total weight of catch	Total number of catch			H	D	E	C
Abbottina rivularis	60	536.29	10	0.666667	0.0362319	0.0058047	4.20366	280.244			1656	92389	-0.120211		2	3.50775	0.606826	0.3932
Gobio rivularis	0	0	0	0	0	0	0	0
Cobitis granoei	0	0	0	0	0	0	0	0
Lefua costata	3	6.85	2	0.133333	0.00181159	7.4143e-05	0.188574	2.51432					-0.0114376
Rhinogobius cliffordpopei	0	0	0	0	0	0	0	0
Hemiculter leucisculus	167	1502.17	7	0.466667	0.100845	0.0162592	11.7105	546.488					-0.231356
Ctenopharyngodon idella	4	3808.9	4	0.266667	0.00241546	0.0412268	4.36422	116.379					-0.0145552
Hypomesus olidus	14	37.92	6	0.4	0.00845411	0.000410438	0.886454	35.4582					-0.0403523
Squaliobarbus curriculus	1	346.2	1	0.0666667	0.000603865	0.0037472	0.435106	2.90071					-0.00447594
Rhinogobio nasutus	0	0	0	0	0	0	0	0
Paramisgurnus dabryanus	38	509.19	5	0.333333	0.0229469	0.00551137	2.84582	94.8608					-0.0866146
Rhodeus ocellatus	17	28.9	5	0.333333	0.0102657	0.000312808	1.05785	35.2617					-0.0470061
Perca fluviatilis	5	143.81	2	0.133333	0.00301932	0.00155657	0.457589	6.10119					-0.0175203
Cultrichthys erythropterus	1	109.88	1	0.0666667	0.000603865	0.00118932	0.179318	1.19546					-0.00447594
Hemibarbus maculatus	3	202.55	2	0.133333	0.00181159	0.00219236	0.400395	5.33861					-0.0114376
Triplophysa pappenheimi	16	102.42	5	0.333333	0.00966184	0.00110857	1.07704	35.9014					-0.0448268
Gobio huanghensis	205	1407.1	11	0.733333	0.123792	0.0152302	13.9022	1019.5	Dominant species				-0.258621
Leuciscus chuanchicus	106	14629	11	0.733333	0.0640097	0.158341	22.2351	1630.57	Dominant species				-0.175945
Hypseleotris swinhonis	22	16.33	8	0.533333	0.013285	0.000176753	1.34618	71.7961					-0.0574062
Carassius auratus	141	3741.65	12	0.8	0.0851449	0.0404989	12.5644	1005.15	Dominant species				-0.209746
Cyprinus carpio var. specularis	0	0	0	0	0	0	0	0
Silurus lanzhouensis	15	4381.2	4	0.266667	0.00905797	0.0474212	5.64792	150.611					-0.0426097
Cyprinus carpio	55	50075	10	0.666667	0.0332126	0.542002	57.5214	3834.76	Dominant species				-0.113083
Hypophthalmichthys molitrix	5	4645.54	3	0.2	0.00301932	0.0502824	5.33017	106.603					-0.0175203
Pseudorasbora parva	33	63.48	9	0.6	0.0199275	0.000687095	2.06146	123.688					-0.0780293
Misgurnus anguillicaudatus	7	7.59	7	0.466667	0.00422705	8.21526e-05	0.430921	20.1096					-0.0231061
Oncorhynchus mykiss	1	1369.4	1	0.0666667	0.000603865	0.0148221	1.5426	10.284					-0.00447594
Triplophysa siluroides	1	234.82	1	0.0666667	0.000603865	0.00254164	0.314551	2.09701					-0.00447594
Silurus asotus	2	640.26	2	0.133333	0.00120773	0.00693005	0.813778	10.8504					-0.00811475
Oryzias latipes	0	0	0	0	0	0	0	0
Gobiobotia spp.	0	0	0	0	0	0	0	0
Culter alburnus	0	0	0	0	0	0	0	0
Megalobrama amblycephala	0	0	0	0	0	0	0	0
Acipenser	1	405.8	1	0.0666667	0.000603865	0.0043923	0.499616	3.33078					-0.00447594
Sander lucioperca	0	0	0	0	0	0	0	0
Gobio gracilis	0	0	0	0	0	0	0	0
Channa argus	0	0	0	0	0	0	0	0
Acanthorhodeus chankaensis	731	3436.31	9	0.6	0.441425	0.0371939	47.8619	2871.71	优势种				-0.360974
Hypophthalmichthys nobilis	0	0	0	0	0	0	0	0
Rhodeus sinensis	2	0.98	1	0.0666667	0.00120773	1.06073e-05	0.121834	0.812225					-0.00811475
Rhinogobius giurinus	0	0	0	0	0	0	0	0
Aphyocypris chinensis	0	0	0	0	0	0	0	0
									Abbottina rivularis
									Gobio rivularis
									Cobitis granoei
									Lefua costata
									Rhinogobius cliffordpopei
									Hemiculter leucisculus
									Ctenopharyngodon idella
									Hypomesus olidus
									Squaliobarbus curriculus
									Rhinogobio nasutus
									Paramisgurnus dabryanus
									Rhodeus ocellatus
									Perca fluviatilis
									Cultrichthys erythropterus
									Hemibarbus maculatus
									Triplophysa pappenheimi
									Gobio huanghensis
									Leuciscus chuanchicus
									Hypseleotris swinhonis
									Carassius auratus
									Cyprinus carpio var. specularis
									Silurus lanzhouensis
									Cyprinus carpio
									Hypophthalmichthys molitrix
									Pseudorasbora parva
									Misgurnus anguillicaudatus
									Oncorhynchus mykiss
									Triplophysa siluroides
									Silurus asotus
									Oryzias latipes
									Gobiobotia spp.
									Culter alburnus
									Megalobrama amblycephala
									Acipenser sinensis
									Sander lucioperca
									Gobio gracilis
									Channa argus
									Acanthorhodeus chankaensis
									Hypophthalmichthys nobilis
									Rhodeus sinensis
									Rhinogobius giurinus
									Aphyocypris chinensis

## Sheet: 2023.5
Species	Number	Weight	F	F%	N%	W%	N%+W%*100	IRI			Total weight of catch	Total number of catch
Abbottina rivularis	85	110.5	7	0.466667	0.0127954	0.000598326	1.33937	62.5042			6643	184682	-0.00293563
Gobio rivularis	0	0	0	0	0	0	0	0
Cobitis granoei	2	2.64	1	0.0666667	0.000301069	1.42948e-05	0.0315364	0.210242					-3.71315e-05
Lefua costata	1	1.24	1	0.0666667	0.000150534	6.71424e-06	0.0157249	0.104832					-1.71036e-05
Rhinogobius cliffordpopei	3	3.21	3	0.2	0.000451603	1.73812e-05	0.0468984	0.937969					-5.86292e-05
Hemiculter leucisculus	101	1572.4	5	0.333333	0.015204	0.00851409	2.37181	79.0602					-0.00363193
Ctenopharyngodon idella	4	19343.2	3	0.2	0.000602138	0.104738	10.534	210.68					-8.12051e-05
Hypomesus olidus	7	24.39	3	0.2	0.00105374	0.000132065	0.118581	2.37161					-0.000153709
Squaliobarbus curriculus	1	390.25	1	0.0666667	0.000150534	0.00211309	0.226363	1.50908					-1.71036e-05
Rhinogobio nasutus	3	488.76	2	0.133333	0.000451603	0.0026465	0.30981	4.1308					-5.86292e-05
Paramisgurnus dabryanus	2	3.43	1	0.0666667	0.000301069	1.85725e-05	0.0319641	0.213094					-3.71315e-05
Rhodeus ocellatus	482	541.66	7	0.466667	0.0725576	0.00293293	7.54905	352.289					-0.0276581
Perca fluviatilis	1	112.93	1	0.0666667	0.000150534	0.000611484	0.0762018	0.508012					-1.71036e-05
Cultrichthys erythropterus	20	1261.35	3	0.2	0.00301069	0.00682985	0.984054	19.6811					-0.000518585
Hemibarbus maculatus	11	864.5	2	0.133333	0.00165588	0.00468102	0.63369	8.4492					-0.000258593
Triplophysa pappenheimi	5	159.2	5	0.333333	0.000752672	0.000862022	0.161469	5.38231					-0.000104656
Gobio huanghensis	1141	3797.4	12	0.8	0.17176	0.0205618	19.2322	1538.57	Dominant species				-0.0974989
Leuciscus chuanchicus	132	3374.54	8	0.533333	0.0198705	0.0182722	3.81427	203.428					-0.00507093
Hypseleotris swinhonis	64	30.9	7	0.466667	0.0096342	0.000167315	0.980152	45.7404					-0.00207525
Carassius auratus	801	26137	13	0.866667	0.120578	0.141524	26.2102	2271.55	Dominant species				-0.0569986
Cyprinus carpio var. specularis	1	752.6	1	0.0666667	0.000150534	0.00407511	0.422565	2.8171					-1.71036e-05
Silurus lanzhouensis	61	19777	10	0.666667	0.0091826	0.107087	11.6269	775.129					-0.00195772
Cyprinus carpio	73	66818	10	0.666667	0.010989	0.3618	37.2789	2485.26	Dominant species				-0.00243612
Hypophthalmichthys molitrix	18	8205.4	2	0.133333	0.00270962	0.0444299	4.71395	62.8527					-0.000458407
Pseudorasbora parva	1643	1658.53	12	0.8	0.247328	0.00898046	25.6308	2050.47	Dominant species				-0.177037
Misgurnus anguillicaudatus	5	16.6	4	0.266667	0.000752672	8.98842e-05	0.0842556	2.24682					-0.000104656
Oncorhynchus mykiss	0	0	0	0	0	0	0	0
Triplophysa siluroides	0	0	0	0	0	0	0	0
Silurus asotus	30	21326	6	0.4	0.00451603	0.115474	11.999	479.96					-0.000836283
Oryzias latipes	5	1.82	3	0.2	0.000752672	9.85478e-06	0.0762527	1.52505					-0.000104656
Gobiobotia spp.	7	6.4	2	0.133333	0.00105374	3.46542e-05	0.108839	1.45119					-0.000153709
Culter alburnus	0	0	0	0	0	0	0	0
Megalobrama amblycephala	0	0	0	0	0	0	0	0
Acipenser	1	648.39	1	0.0666667	0.000150534	0.00351085	0.366138	2.44092					-1.71036e-05
Sander lucioperca	1	1268	1	0.0666667	0.000150534	0.00686586	0.701639	4.67759					-1.71036e-05
Gobio gracilis	0	0	0	0	0	0	0	0
Channa argus	1	1285	1	0.0666667	0.000150534	0.00695791	0.710844	4.73896					-1.71036e-05
Acanthorhodeus chankaensis	1472	3156.61	7	0.466667	0.221587	0.0170921	23.8679	1113.83	优势种				-0.147044
Hypophthalmichthys nobilis	1	1219.08	1	0.0666667	0.000150534	0.00660097	0.67515	4.501					-1.71036e-05
Rhodeus sinensis	408	283.75	7	0.466667	0.061418	0.00153642	6.29545	293.787					-0.0220132
Rhinogobius giurinus	49	38.43	8	0.533333	0.00737619	0.000208087	0.758427	40.4495					-0.00150243
Aphyocypris chinensis	1	1.34	1	0.0666667	0.000150534	7.25572e-06	0.015779	0.105193					-1.71036e-05

## Sheet: 2023.9
Species	Number	Weight	F	F%	N%	W%	N%+W%*100	IRI		Total weight of catch	Total number of catch
Abbottina rivularis	65	108.64	10	0.666667	0.0240652	0.00135815	2.54233	169.489		2701	79991
Gobio rivularis	1	2.59	1	0.0666667	0.000370233	3.23786e-05	0.0402612	0.268408
Cobitis granoei	1	0.93	1	0.0666667	0.000370233	1.16263e-05	0.038186	0.254573
Lefua costata	1	2.45	1	0.0666667	0.000370233	3.06284e-05	0.0400862	0.267241
Rhinogobius cliffordpopei	8	7.19	4	0.266667	0.00296187	8.98851e-05	0.305175	8.138
Hemiculter leucisculus	51	632.4	5	0.333333	0.0188819	0.00790589	2.67878	89.2926
Ctenopharyngodon idella	4	5708.35	3	0.2	0.00148093	0.0713624	7.28433	145.687
Hypomesus olidus	55	159.48	7	0.466667	0.0203628	0.00199372	2.23566	104.331
Squaliobarbus curriculus	2	434.45	2	0.133333	0.000740466	0.00543124	0.61717	8.22894
Rhinogobio nasutus	12	1413.25	2	0.133333	0.0044428	0.0176676	2.21104	29.4805
Paramisgurnus dabryanus	9	142.08	5	0.333333	0.0033321	0.0017762	0.51083	17.0277
Rhodeus ocellatus	15	32.87	5	0.333333	0.0055535	0.000410921	0.596442	19.8814
Perca fluviatilis	8	1733.24	1	0.0666667	0.00296187	0.0216679	2.46298	16.4199
Cultrichthys erythropterus	27	627.43	3	0.2	0.0099963	0.00784376	1.78401	35.6801
Hemibarbus maculatus	5	216.06	4	0.266667	0.00185117	0.00270105	0.455222	12.1393
Triplophysa pappenheimi	3	8.19	1	0.0666667	0.0011107	0.000102387	0.121309	0.808724
Gobio huanghensis	258	1606.82	12	0.8	0.0955202	0.0200875	11.5608	924.862	Dominant species
Leuciscus chuanchicus	288	8546.53	9	0.6	0.106627	0.106844	21.3471	1280.82	Dominant species
Hypseleotris swinhonis	15	16.09	6	0.4	0.0055535	0.000201148	0.575465	23.0186
Carassius auratus	162	8666.24	12	0.8	0.0599778	0.10834	16.8318	1346.54	Dominant species
Cyprinus carpio var. specularis	0	0	0	0	0	0	0	0
Silurus lanzhouensis	15	954.52	8	0.533333	0.0055535	0.0119328	1.74863	93.2605
Cyprinus carpio	24	18198	6	0.4	0.0088856	0.227501	23.6386	945.545
Hypophthalmichthys molitrix	16	8532.17	4	0.266667	0.00592373	0.106664	11.2588	300.234
Pseudorasbora parva	184	197.65	12	0.8	0.0681229	0.0024709	7.05938	564.751
Misgurnus anguillicaudatus	0	0	0	0	0	0	0	0
Oncorhynchus mykiss	0	0	0	0	0	0	0	0
Triplophysa siluroides	0	0	0	0	0	0	0	0
Silurus asotus	6	2842.37	3	0.2	0.0022214	0.0355336	3.7755	75.51
Oryzias latipes	1	0.32	1	0.0666667	0.000370233	4.00045e-06	0.0374234	0.249489
Gobiobotia spp.	9	5.32	3	0.2	0.0033321	6.65075e-05	0.339861	6.79721
Culter alburnus	0	0	0	0	0	0	0	0
Megalobrama amblycephala	0	0	0	0	0	0	0	0
Acipenser	0	0	0	0	0	0	0	0
Sander lucioperca	14	12214	1	0.0666667	0.00518327	0.152692	15.7875	105.25
Gobio gracilis	2	1.38	1	0.0666667	0.000740466	1.72519e-05	0.0757718	0.505146
Channa argus	1	320.76	1	0.0666667	0.000370233	0.00400995	0.438018	2.92012
Acanthorhodeus chankaensis	428	1645.12	10	0.666667	0.15846	0.0205663	17.9026	1193.51	Dominant species
Hypophthalmichthys nobilis	3	4438.04	1	0.0666667	0.0011107	0.0554817	5.65924	37.7283
Rhodeus sinensis	218	287	7	0.466667	0.0807108	0.0035879	8.42988	393.394
Rhinogobius giurinus	790	289.43	7	0.466667	0.292484	0.00361828	29.6103	1381.81	Dominant species
Aphyocypris chinensis	0	0	0	0	0	0	0	0

## Sheet: 2022.7
Species	Number	Weight	F	F%	N%	W%	N%+W%*100	IRI
Abbottina rivularis	26	59.47	6	0.4	0.00575094	0.000280511	0.603145	24.1258
Gobio rivularis	0	0		0	0	0	0	0
Cobitis granoei	1	0.28	1	0.0666667	0.00022119	1.32072e-06	0.0222511	0.14834
Lefua costata	0	0		0	0	0	0	0
Rhinogobius cliffordpopei	5	6.26	3	0.2	0.00110595	2.95275e-05	0.113548	2.27095
Hemiculter leucisculus	46	984.03	5	0.333333	0.0101747	0.00464152	1.48163	49.3875
Ctenopharyngodon idella	3	406	1	0.0666667	0.00066357	0.00191504	0.257861	1.71907
Hypomesus olidus	51	566	6	0.4	0.0112807	0.00266974	1.39504	55.8017
Squaliobarbus curriculus	3	775	2	0.133333	0.00066357	0.00365556	0.431913	5.75884
Rhinogobio nasutus	2	56.17	2	0.133333	0.00044238	0.000264945	0.0707325	0.9431
Paramisgurnus dabryanus	5	159.2	5	0.333333	0.00110595	0.000750922	0.185687	6.18957
Rhodeus ocellatus	206	304	9	0.6	0.0455651	0.00143392	4.69991	281.994
Perca fluviatilis	94	950.39	4	0.266667	0.0207919	0.00448284	2.52747	67.3992
Cultrichthys erythropterus	14	1152.56	1	0.0666667	0.00309666	0.00543645	0.853311	5.68874
Hemibarbus maculatus	77	2499.38	5	0.333333	0.0170316	0.0117892	2.88208	96.0694
Triplophysa pappenheimi	44	51.11	4	0.266667	0.00973236	0.000241078	0.997344	26.5958
Gobio huanghensis	1095	7329.93	13	0.866667	0.242203	0.0345742	27.6777	2398.74	Dominant species
Leuciscus chuanchicus	186	26114	9	0.6	0.0411413	0.123176	16.4317	985.903
Hypseleotris swinhonis	235	61.3	5	0.333333	0.0519797	0.000289143	5.22688	174.229
Carassius auratus	281	17007	12	0.8	0.0621544	0.0802194	14.2374	1138.99	Dominant species
Cyprinus carpio var. specularis	2	1520	2	0.133333	0.00044238	0.00716961	0.761199	10.1493
Silurus lanzhouensis	166	18259	14	0.933333	0.0367175	0.0861249	12.2842	1146.53	Dominant species
Cyprinus carpio	108	107917	11	0.733333	0.0238885	0.509028	53.2917	3908.05	Dominant species
Hypophthalmichthys molitrix	18	16850	4	0.266667	0.00398142	0.0794789	8.34603	222.561
Pseudorasbora parva	1127	1798	7	0.466667	0.249281	0.00848089	25.7762	1202.89	Dominant species
Misgurnus anguillicaudatus	13	30.53	5	0.333333	0.00287547	0.000144005	0.301948	10.0649
Oncorhynchus mykiss	0	0		0	0	0	0	0
Triplophysa siluroides	11	970	2	0.133333	0.00243309	0.00457534	0.700843	9.34458
Silurus asotus	0	0		0	0	0	0	0
Oryzias latipes	0	0		0	0	0	0	0
Gobiobotia spp.	3	32.55	2	0.133333	0.00066357	0.000153533	0.0817103	1.08947
Culter alburnus	1	287.9	1	0.0666667	0.00022119	0.00135798	0.157917	1.05278
Megalobrama amblycephala	1	1337.1	1	0.0666667	0.00022119	0.0063069	0.652809	4.35206
Acipenser	2	1499.8	1	0.0666667	0.00044238	0.00707433	0.751671	5.01114
Sander lucioperca	0	0		0	0	0	0	0
Gobio gracilis	2	801.14	1	0.0666667	0.00044238	0.00377886	0.422124	2.81416
Channa argus	399	370.41	6	0.4	0.0882548	0.00174717	9.0002	360.008
Acanthorhodeus chankaensis	2	1561.85	1	0.0666667	0.00044238	0.00736701	0.780939	5.20626
Hypophthalmichthys nobilis	190	168.9	3	0.2	0.0420261	0.000796676	4.28228	85.6456
Rhodeus sinensis	102	120.14	4	0.266667	0.0225614	0.000566682	2.31281	61.6748
Rhinogobius giurinus	1	8	1	0.0666667
Aphyocypris chinensis

## Sheet: S1
Species	Number	Weight	F	F%	N%	W%	N%+W%*100	IRI		Total weight of catch	Total number of catch	H	D	E	C
Cobitis granoei	1	2.94	1	0.25	0.00763359	0.000320611	0.79542	19.8855		9170	131	-0.0372152			5.82717e-05
Hypomesus olidus	9	38.97	1	0.25	0.0687023	0.00424973	7.2952	182.38				-0.183983			0.00472
Triplophysa pappenheimi	2	6.19	1	0.25	0.0152672	0.000675027	1.59422	39.8555				-0.0638481			0.000233087
Gobio huanghensis	96	2853.69	4	1	0.732824	0.311198	104.402	10440.2	Dominant species			-0.227798			0.537032
Hypseleotris swinhonis	2	2.69	1	0.25	0.0152672	0.000293348	1.55605	38.9013				-0.0638481			0.000233087
Carassius auratus	2	53.69	2	0.5	0.0152672	0.00585496	2.11221	105.611				-0.0638481			0.000233087
Oncorhynchus mykiss	1	1369.4	1	0.25	0.00763359	0.149335	15.6968	392.421				-0.0372152			5.82717e-05
Silurus lanzhouensis	1	930	1	0.25	0.00763359	0.101418	10.9051	272.628				-0.0372152			5.82717e-05
Cyprinus carpio	2	1715	2	0.5	0.0152672	0.187023	20.229	1011.45	Dominant species			-0.0638481			0.000233087
Pseudorasbora parva	5	8.42	1	0.25	0.0381679	0.000918212	3.90862	97.7154				-0.124647			0.00145679
Misgurnus anguillicaudatus	1	1.92	1	0.25	0.00763359	0.000209378	0.784297	19.6074				-0.0372152			5.82717e-05
Triplophysa siluroides	1	234.82	1	0.25	0.00763359	0.0256074	3.3241	83.1025				-0.0372152			5.82717e-05
Silurus asotus	5	1932.38	2	0.5	0.0381679	0.210728	24.8896	1244.48	Dominant species			-0.124647			0.00145679
Acanthorhodeus chankaensis	3	20.28	1	0.25	0.0229008	0.00221156	2.51123	62.7808				-0.0864867			0.000524445
															0.5464
												1.189	2.66656	0.45054	0.4536

## Sheet: S2
Species	Number	Weight	F	F%	N%	W%	N%+W%*100	IRI		Total weight of catch	Total number of catch	H	D	E	C
Abbottina rivularis	5	11.54	1	0.25	0.0170648	0.000976559	1.80414	45.1035		11817	293	-0.0694665			0.000291209
Hypomesus olidus	1	0.27	1	0.25	0.00341297	2.28484e-05	0.343582	8.58954				-0.0193863			1.16484e-05
Squaliobarbus curriculus	1	390.24	1	0.25	0.00341297	0.0330236	3.64366	91.0914				-0.0193863			1.16484e-05
Paramisgurnus dabryanus	20	369.26	3	0.75	0.0682594	0.0312482	9.95076	746.307				-0.183238			0.00465934
Triplophysa pappenheimi	7	42.5	3	0.75	0.0238908	0.00359651	2.74873	206.155				-0.0892145			0.00057077
Gobio huanghensis	182	3514	4	1	0.62116	0.297368	91.8529	9185.29	Dominant species			-0.295775			0.38584
Leuciscus chuanchicus	10	262.01	3	0.75	0.0341297	0.0221723	5.6302	422.265				-0.115276			0.00116484
Carassius auratus	15	362.19	2	0.5	0.0511945	0.0306499	8.18445	409.222				-0.152156			0.00262088
Silurus lanzhouensis	5	1477.78	1	0.25	0.0170648	0.125055	14.212	355.301				-0.0694665			0.000291209
Cyprinus carpio	10	4678.82	3	0.75	0.0341297	0.39594	43.0069	3225.52	Dominant species			-0.115276			0.00116484
Pseudorasbora parva	33	111.15	3	0.75	0.112628	0.00940594	12.2034	915.254				-0.245942			0.0126851
Silurus asotus	3	596	1	0.25	0.0102389	0.0504358	6.06747	151.687				-0.0469102			0.000104835
Rhodeus sinensis	1	1.28	1	0.25	0.00341297	0.000108319	0.352129	8.80322				-0.0193863			1.16484e-05
												1.44	2.11261	0.561415	0.5906

## Sheet: S3
Species	Number	Weight	F	F%	N%	W%	N%+W%*100	IRI		Total weight of catch	Total number of catch	H	D	E	C
Abbottina rivularis	2	2.22	2	0.5	0.00364299	6.0331e-05	0.370332	18.5166		36797	549	-0.0204552			1.32714e-05
Cobitis granoei	2	2.66	1	0.25	0.00364299	7.22885e-05	0.371528	9.28819				-0.0204552			1.32714e-05
Lefua costata	2	3.91	1	0.25	0.00364299	0.000106259	0.374925	9.37311				-0.0204552			1.32714e-05
Rhinogobius cliffordpopei	6	5.94	3	0.75	0.010929	0.000161426	1.10904	83.1779				-0.0493589			0.000119442
Hypomesus olidus	34	58.8	2	0.5	0.0619308	0.00159796	6.35287	317.644				-0.172275			0.00383542
Paramisgurnus dabryanus	1	30.51	1	0.25	0.00182149	0.000829144	0.265064	6.62659				-0.0114902			3.31784e-06
Rhodeus ocellatus	8	11.88	2	0.5	0.0145719	0.000322852	1.48948	74.474				-0.0616198			0.000212342
Perca fluviatilis	1	102.6	1	0.25	0.00182149	0.00278827	0.460976	11.5244				-0.0114902			3.31784e-06
Triplophysa pappenheimi	55	116.85	2	0.5	0.100182	0.00317553	10.3358	516.788				-0.230496			0.0100365
Gobio huanghensis	150	1588.98	4	1	0.273224	0.0431823	31.6406	3164.06	Dominant species			-0.354498			0.0746514
Leuciscus chuanchicus	25	1114.88	2	0.5	0.0455373	0.0302981	7.58355	379.177				-0.140675			0.00207365
Hypseleotris swinhonis	5	2.6	1	0.25	0.00910747	7.06579e-05	0.917813	22.9453				-0.0427929			8.2946e-05
Carassius auratus	76	2292	3	0.75	0.138434	0.0622877	20.0721	1505.41	Dominant species			-0.273734			0.0191638
Silurus lanzhouensis	12	2301	2	0.5	0.0218579	0.0625323	8.43902	421.951				-0.083567			0.000477769
Cyprinus carpio	33	28942	2	0.5	0.0601093	0.786532	84.6641	4233.2	Dominant species			-0.169003			0.00361313
Pseudorasbora parva	111	175.14	4	1	0.202186	0.00475963	20.6945	2069.45	Dominant species			-0.323208			0.0408791
Misgurnus anguillicaudatus	1	0.84	1	0.25	0.00182149	2.28279e-05	0.184432	4.6108				-0.0114902			3.31784e-06
Acanthorhodeus chankaensis	12	33.66	2	0.5	0.0218579	0.000914748	2.27727	113.863				-0.083567			0.000477769
Rhinogobius giurinus	13	10.84	3	0.75	0.0236794	0.000294589	2.3974	179.805				-0.0886356			0.000560715
												2.169	2.85347	0.736643	0.8438

## Sheet: S4
Species	Number	Weight	F	F%	N%	W%	N%+W%*100	IRI		Total weight of catch	Total number of catch	H	D	E	C
Abbottina rivularis	27	48.21	2	0.5	0.0205323	0.002389	2.29213	114.607		20180	1315	-0.0797836			0.000421576
Rhinogobius cliffordpopei	2	2.17	1	0.25	0.00152091	0.000107532	0.162844	4.07111				-0.00986836			2.31317e-06
Hemiculter leucisculus	7	35.59	1	0.25	0.00532319	0.00176363	0.708682	17.7171				-0.0278705			2.83364e-05
Hypomesus olidus	19	79.16	1	0.25	0.0144487	0.0039227	1.83714	45.9284				-0.0612212			0.000208764
Rhodeus ocellatus	15	26.62	1	0.25	0.0114068	0.00131913	1.2726	31.8149				-0.051029			0.000130116
Perca fluviatilis	91	765.55	1	0.25	0.0692015	0.0379361	10.7138	267.844				-0.184819			0.00478885
Triplophysa pappenheimi	1	4.29	1	0.25	0.000760456	0.000212587	0.0973043	2.43261				-0.00546129			5.78294e-07
Gobio huanghensis	210	354	4	1	0.159696	0.0175421	17.7238	1772.38	Dominant species			-0.292959			0.0255028
Leuciscus chuanchicus	26	3458	3	0.75	0.0197719	0.171358	19.113	1433.47	Dominant species			-0.0775748			0.000390927
Hypseleotris swinhonis	2	0.66	1	0.25	0.00152091	3.27056e-05	0.155362	3.88405				-0.00986836			2.31317e-06
Carassius auratus	29	1406.18	3	0.75	0.0220532	0.0696819	9.17351	688.013				-0.0841176			0.000486345
Silurus lanzhouensis	28	2547	3	0.75	0.0212928	0.126214	14.7507	1106.3	Dominant species			-0.0819641			0.000453382
Cyprinus carpio	7	9935	3	0.75	0.00532319	0.492319	49.7642	3732.32	Dominant species			-0.0278705			2.83364e-05
Pseudorasbora parva	774	1297	2	0.5	0.588593	0.0642716	65.2865	3264.32	Dominant species			-0.311966			0.346442
Misgurnus anguillicaudatus	1	0.33	1	0.25	0.000760456	1.63528e-05	0.0776809	1.94202				-0.00546129			5.78294e-07
Oryzias latipes	2	0.5	1	0.25	0.00152091	2.4777e-05	0.154569	3.86422				-0.00986836			2.31317e-06
Acanthorhodeus chankaensis	18	139	1	0.25	0.0136882	0.00688801	2.05762	51.4406				-0.0587391			0.000187367
Rhodeus sinensis	35	37.7	2	0.5	0.026616	0.00186819	2.84842	142.421				-0.096516			0.00070841
Rhinogobius giurinus	21	43.98	2	0.5	0.0159696	0.00217939	1.8149	90.7448				-0.0660673			0.000255028
												1.543	2.50641	0.524039	0.62

## Sheet: S5
Species	Number	Weight	F	F%	N%	W%	N%+W%*100	IRI		Total weight of catch	Total number of catch	H	D	E	C
Abbottina rivularis	5	6.7	2	0.5	0.0101833	0.000129534	1.03128	51.5642		51724	491	-0.0467109			0.0001037
Cobitis granoei	1	0.52	1	0.25	0.00203666	1.00534e-05	0.204671	5.11678				-0.01262			4.14798e-06
Rhinogobius cliffordpopei	2	2.6	1	0.25	0.00407332	5.02668e-05	0.412359	10.309				-0.0224167			1.65919e-05
Hemiculter leucisculus	9	27.6	1	0.25	0.0183299	0.000533601	1.88635	47.1589				-0.0733055			0.000335987
Ctenopharyngodon idella	2	10961	1	0.25	0.00407332	0.211913	21.5987	539.966				-0.0224167			1.65919e-05
Hypomesus olidus	6	2.56	3	0.75	0.01222	4.94935e-05	1.22695	92.0209				-0.0538251			0.000149327
Squaliobarbus curriculus	2	42.84	2	0.5	0.00407332	0.000828242	0.490156	24.5078				-0.0224167			1.65919e-05
Rhodeus ocellatus	1	1.89	1	0.25	0.00203666	3.65401e-05	0.20732	5.183				-0.01262			4.14798e-06
Perca fluviatilis	4	62.95	4	1	0.00814664	0.00121704	0.936368	93.6368				-0.0391866			6.63677e-05
Triplophysa pappenheimi	4	6.04	2	0.5	0.00814664	0.000116774	0.826341	41.3171				-0.0391866			6.63677e-05
Gobio huanghensis	282	576	4	1	0.574338	0.011136	58.5474	5854.74	Dominant species			-0.318492			0.329864
Leuciscus chuanchicus	61	1728.71	4	1	0.124236	0.0334218	15.7658	1576.58	Dominant species			-0.259103			0.0154346
Hypseleotris swinhonis	3	0.95	2	0.5	0.00610998	1.83667e-05	0.612835	30.6417				-0.0311476			3.73319e-05
Carassius auratus	40	2448.17	4	1	0.0814664	0.0473314	12.8798	1287.98	Dominant species			-0.204282			0.00663677
Silurus lanzhouensis	16	4339	3	0.75	0.0325866	0.0838876	11.6474	873.556				-0.111572			0.00106188
Cyprinus carpio	29	30212	3	0.75	0.0590631	0.5841	64.3163	4823.73	Dominant species			-0.167098			0.00348845
Pseudorasbora parva	15	11.02	4	1	0.0305499	0.000213054	3.0763	307.63				-0.10657			0.000933296
Oryzias latipes	2	0.27	1	0.25	0.00407332	5.22001e-06	0.407854	10.1963				-0.0224167			1.65919e-05
Channa argus	1	1285	1	0.25	0.00203666	0.0248434	2.68801	67.2001				-0.01262			4.14798e-06
Acanthorhodeus chankaensis	3	4.84	2	0.5	0.00610998	9.35736e-05	0.620355	31.0178				-0.0311476			3.73319e-05
Rhodeus sinensis	2	1.91	2	0.5	0.00407332	3.69268e-05	0.411025	20.5512				-0.0224167			1.65919e-05
Rhinogobius giurinus	1	2.1	1	0.25	0.00203666	4.06001e-05	0.207726	5.19315				-0.01262			4.14798e-06
												1.644	3.38904	0.531859	0.6417

## Sheet: S6
Species	Number	Weight	F	F%	N%	W%	N%+W%*100	IRI		Total weight of catch	Total number of catch	H	D	E	C
Abbottina rivularis	29	35.26	2	0.5	0.0421512	0.00076167	4.29128	214.564		46293	688	-0.133471			0.00177672
Gobio rivuloides	3	4.69	1	0.25	0.00436047	0.000101311	0.446178	11.1544				-0.0236999			1.90137e-05
Cobitis granoei	1	1.32	1	0.25	0.00145349	2.8514e-05	0.1482	3.70501				-0.00949679			2.11263e-06
Perca fluviatilis	1	80.86	1	0.25	0.00145349	0.0017467	0.320019	8.00047				-0.00949679			2.11263e-06
Gobio huanghensis	150	75.44	2	0.5	0.218023	0.00162962	21.9653	1098.26	Dominant species			-0.332083			0.0475341
Leuciscus chuanchicus	75	13406	3	0.75	0.109012	0.28959	39.8602	2989.51	Dominant species			-0.241603			0.0118835
Hypseleotris swinhonis	3	1.23	1	0.25	0.00436047	2.65699e-05	0.438704	10.9676				-0.0236999			1.90137e-05
Carassius auratus	32	2413.1	2	0.5	0.0465116	0.0521267	9.86383	493.191				-0.1427			0.00216333
Silurus lanzhouensis	1	654.47	1	0.25	0.00145349	0.0141376	1.5591	38.9776				-0.00949679			2.11263e-06
Cyprinus carpio	22	27756	3	0.75	0.0319767	0.599572	63.1549	4736.62	Dominant species			-0.110088			0.00102251
Hypophthalmichthys molitrix	4	1676.91	2	0.5	0.00581395	0.0362238	4.20378	210.189				-0.0299273			3.38021e-05
Pseudorasbora parva	356	176	2	0.5	0.517442	0.00380187	52.1244	2606.22	Dominant species			-0.340921			0.267746
Oryzias latipes	3	1.2	1	0.25	0.00436047	2.59218e-05	0.438639	10.966				-0.0236999			1.90137e-05
Acanthorhodeus chankaensis	4	7.37	1	0.25	0.00581395	0.000159203	0.597316	14.9329				-0.0299273			3.38021e-05
Rhodeus sinensis	4	3.51	1	0.25	0.00581395	7.58214e-05	0.588977	14.7244				-0.0299273			3.38021e-05
												1.49	2.14271	0.550211	0.6678

[truncated: 10 more sheets: S7, S8, S11, S9, S10, S12, S13, S14, S15, Four diversity indices for each]
