# Supplementary material for: Fish community structure and diversity in the Ningxia section of the main stream of the Yellow River in China
Source: PeerJ. 2025 Dec 19;13:e20228. doi: 10.7717/peerj.20228 (PMC12721126; doi:10.7717/peerj.20228)
Supplement: Supplemental Information 2 [file peerj-13-20228-s002.xlsx]

## Sheet: Sheet1
species	S1	S2	S3	S4	S5	S6	S7	S8	S9	S10	S11	S12	S13	S14	S15
Abbottina rivularis	0	5	2	27	5	29	7	21	12	17	6	6	52	13	18
Gobio rivuloides	0	0	0	0	0	3	0	0	0	0	1	0	0	0	0
Cobitis granoei	1	0	2	0	1	1	0	0	0	0	0	0	1	0	1
Lefua costata	0	0	2	0	0	0	0	1	0	0	0	0	0	0	0
Rhinogobius cliffordpopei	0	0	6	2	2	0	1	0	0	1	1	1	1	0	0
Hemiculter leucisculus	0	0	0	7	9	0	1	0	22	67	31	31	180	9	1
Ctenopharyngodon idella	0	0	0	0	2	0	1	1	1	1	1	0	5	1	2
Hypomesus olidus	9	1	34	19	6	0	17	16	4	2	0	7	11	3	13
Squaliobarbus curriculus	0	1	0	0	2	0	0	0	1	2	0	1	1	1	0
Rhinogobio nasutus	0	0	0	0	0	0	0	0	0	0	1	2	0	9	3
Paramisgurnus dabryanus	0	20	1	0	0	0	2	2	0	1	0	20	0	0	3
Rhodeus ocellatus	0	0	8	15	1	0	62	25	0	16	371	9	43	13	26
Perca fluviatilis	0	0	1	91	4	1	7	1	0	0	0	0	1	0	0
Cultrichthys erythropterus	0	0	0	0	0	0	0	0	0	0	1	1	52	1	4
Oncorhynchus mykiss	1	0	0	0	0	0	0	0	0	0	0	0	0	0	0
Hemibarbus maculatus	0	0	0	0	0	0	0	0	0	5	0	2	76	8	4
Triplophysa pappenheimi	2	7	55	1	4	0	1	0	13	1	0	0	0	1	9
Gobio huanghensis	96	182	150	210	282	150	11	430	207	59	70	90	48	39	215
Leuciscus chuanchicus	0	10	25	26	61	75	57	16	7	18	48	221	144	0	3
Hypseleotris swinhonis	2	0	5	2	3	3	5	47	2	16	4	1	7	20	10
Carassius auratus	2	15	76	29	40	32	22	35	8	25	201	42	632	60	164
Cyprinus carpio var. specularis	0	0	0	0	0	0	0	0	0	0	1	0	2	0	0
Silurus lanzhouensis	1	5	12	28	16	1	19	67	6	15	18	15	16	9	27
Cyprinus carpio	2	10	33	7	29	22	9	21	5	3	6	24	70	2	10
Hypophthalmichthys molitrix	0	0	0	0	0	4	9	14	0	0	3	3	22	0	1
Pseudorasbora parva	5	33	111	774	15	356	236	505	2	12	23	11	509	79	85
Misgurnus anguillicaudatus	1	0	1	1	0	0	1	4	1	4	0	9	1	0	2
Triplophysa siluroides	1	0	0	0	0	0	0	0	0	0	0	0	0	0	0
Silurus asotus	5	1	0	0	0	0	4	7	0	0	2	3	17	3	3
Culter alburnus	0	0	0	0	0	0	0	0	0	0	0	0	0	2	1
Gobio gracilis	0	0	0	0	0	0	0	0	0	0	0	0	0	0	2
Oryzias latipes	0	0	0	2	2	3	0	0	0	0	0	0	1	0	0
Megalobrama amblycephala	0	0	0	0	0	0	0	0	0	0	0	0	1	0	0
Gobiobotia spp.	0	0	0	0	0	0	0	1	2	6	0	1	0	5	0
Sander lucioperca	0	0	0	0	0	0	0	0	0	0	0	0	16	0	0
Channa argus	0	0	0	0	1	0	0	1	0	0	0	0	1	0	0
Acanthorhodeus chankaensis	3	0	12	18	3	4	202	10	6	160	204	43	1887	52	381
Acipenser sinensis	0	0	0	0	0	0	0	0	0	1	1	1	0	0	0
Hypophthalmichthys nobilis	0	0	0	0	0	0	0	1	0	0	0	0	5	0	0
Rhodeus sinensis	0	1	0	35	2	4	498	38	0	22	16	2	29	12	28
Aphyocypris chinensis	0	0	0	0	0	0	0	0	0	0	0	0	1	0	1
Rhinogobius giurinus	0	0	13	21	1	0	3	5	1	7	3	2	787	20	2
