# Supplementary material for: Fish community structure and diversity in the Ningxia section of the main stream of the Yellow River in China
Source: PeerJ. 2025 Dec 19;13:e20228. doi: 10.7717/peerj.20228 (PMC12721126; doi:10.7717/peerj.20228)
Supplement: Supplemental Information 3 [file peerj-13-20228-s003.xlsx]

## Sheet: season
	water temperature（℃					dissolved oxygen （mg/L）					Chlorophyll a （ug/L）					Ammonia nitrogen（mg/L）					pH
	2022.7	2023.2	2023.5	2023.9		2022.7	2023.2	2023.5	2023.9		2022.7	2023.2	2023.5	2023.9		2022.7	2023.2	2023.5	2023.9		2022.7	2023.2	2023.5	2023.9
S1	20	8.1	16.5	24.1	17.175	6.8	9.83	7.14	6.49	7.565	0.409	0.6462	1.226	7.0602	2.33535	0.138	0.340981	0.28956	0.452244	0.305196	8.01	8.57	8.48	8.38	8.36
S2	19.5	4.5	16.6	19	14.9	6.8	10.55	7.58	7.22	8.0375	0.237	0.237	0.895	0.1642	0.3833	0.086	0.455693	0.286109	0.406214	0.308504	7.96	8.27	8.48	8.25	8.24
S3	19.4	5.5	16.4	17.9	14.8	6.5	10.29	7.79	7.16	7.935	0.413	0.711	1.0852	1.617	0.95655	0.077	0.306567	0.432787	0.40046	0.304204	7.89	8.6	8.49	8.28	8.315
S4	20.2	5.3	16.5	17.6	14.9	6.4	10.58	7.25	6.72	7.7375	0.377	0.2678	1.7742	1.2292	0.91205	0.068	0.315171	0.270578	0.411968	0.266429	7.84	8.63	8.4	8.07	8.235
S5	19.7	5.1	17.6	17.5	14.975	7.1	9.75	7.65	6.83	7.8325	0.409	0.237	0.9582	0.4076	0.50295	0.097	0.487238	0.298188	0.498274	0.345175	7.97	8.78	8.43	8.25	8.3575
S6	19.8	4.9	14.7	17.4	14.2	8.7	10.62	7.86	5.3	8.12	0.206	0.237	0.3428	0.6462	0.358	0.095	0.35532	0.286109	0.348677	0.271276	7.81	8.64	8.45	8.1	8.25
S7	17.6	4.7	15.1	17.4	13.7	7	10.03	7.07	7.46	7.89	0.409	0.237	1.7394	3.0334	1.3547	0.28	0.570404	0.275755	0.325662	0.362955	7.79	8.92	8.4	8.24	8.3375
S8	18.7	6.7	14.4	17	14.2	7.2	11.01	8.21	8.01	8.6075	0.174	0.4324	0.2338	1.023	0.4658	0.071	0.481503	0.348231	0.262371	0.290776	7.91	8.93	8.66	8.14	8.41
S9	18.7	6.9	16.2	17.2	14.75	7.9	11.33	7.61	7.31	8.5375	0.44	0.0308	1.978	0.1706	0.65485	0.071	0.495842	0.310267	0.268124	0.286308	7.93	8.64	8.51	8.09	8.2925
S10	19.2	7.2	16.9	16.4	14.925	7.1	11.74	7.15	6.98	8.2425	0.645	0.237	0.5166	1.8026	0.8003	0.042	0.527387	0.284383	0.291139	0.286227	8.02	8.77	8.42	8.1	8.3275
S11	19.2	7	16	18.5	15.175	7.3	11.78	7.29	7.39	8.44	0.408	3.2208	1.3334	0.2062	1.2921	0.138	0.527387	0.31717	0.296893	0.319863	8.03	8.65	8.23	8.09	8.25
S12	19.2	8.2	17.7	17.7	15.7	7.5	12.66	6.33	6.42	8.2275	0.235	1.3248	1.0198	0.126	0.6764	0.129	0.596215	0.31717	0.268124	0.327627	8.03	8.93	8.51	8.18	8.4125
S13	19.5	7	17.3	17.7	15.375	7.5	10.08	7.91	7.54	8.2575	0.205	1.7446	1.3626	0.5846	0.9742	0.042	0.541726	0.42761	0.319908	0.332811	8.02	8.89	8.45	7.85	8.3025
S14	19	6.3	16.4	18.1	14.95	7.1	10.36	7.5	7.36	8.08	0.409	7.2324	0.2828	0.131	2.0138	0.092	0.828506	0.439689	0.273878	0.408518	8.01	8.85	8.49	8.15	8.375
S15	19.3	7	16.3	18.1	15.175	8.1	10.76	7.38	7.58	8.455	0.0415	3.2456	0.5426	0.38	1.05242	0.088	0.6346	0.358585	0.3084	0.347396	8.05	8.72	8.48	8.17	8.355

## Sheet: Fifteen sections
	water temperature（℃)	dissolved oxygen （mg/L）	Chlorophyll a （ug/L）	Ammonia nitrogen（mg/L）	pH
S1	17.175	7.565	2.33535	0.305196	8.36
S2	14.9	8.0375	0.3833	0.308504	8.24
S3	14.8	7.935	0.95655	0.304204	8.315
S4	14.9	7.7375	0.91205	0.266429	8.235
S5	14.975	7.8325	0.50295	0.345175	8.3575
S6	14.2	8.12	0.358	0.271276	8.25
S7	13.7	7.89	1.3547	0.362955	8.3375
S8	14.2	8.6075	0.4658	0.290776	8.41
S9	14.75	8.5375	0.65485	0.286308	8.2925
S10	14.925	8.2425	0.8003	0.286227	8.3275
S11	15.175	8.44	1.2921	0.319863	8.25
S12	15.7	8.2275	0.6764	0.327627	8.4125
S13	15.375	8.2575	0.9742	0.332811	8.3025
S14	14.95	8.08	2.0138	0.408518	8.375
S15	15.175	8.455	1.05242	0.347396	8.355

## Sheet: The number of dominant fish s
	Carassius auratus				Cyprinus rubrofuscus				Gobio huanghensis				Leuciscus chuanchicus				Pseudorasbora parva				Acanthorhodeu schankaensis				Silurus lanzhouensis
	2022.7	2023.2	2023.5	2023.9	2022.7	2023.2	2023.5	2023.9	2022.7	2023.2	2023.5	2023.9	2022.7	2023.2	2023.5	2023.9	2022.7	2023.2	2023.5	2023.9	2022.7	2023.2	2023.5	2023.9	2022.7	2023.2	2023.5	2023.9
S1	0	0	1	1	0	0	2	0	56	10	22	8	0	0	0	0	0	0	0	5	0	0	0	3	1	0	0	0
S2	0	0	4	6	0	0	13	2	73	4	41	13	6	0	3	1	15	0	8	5	0	0	0	0	5	0	0	0
S3	7	6	10	10	2	4	40	30	60	33	64	30	15	0	0	9	80	4	470	9	0	0	10	2	8	0	0	1
S4	1	2	3	1	8	1	10	10	22	15	157	9	12	19	10	10	624	1	10	3	0	7	0	1	4	1	7	2
S5	2	0	10	17	8	10	12	10	164	45	370	20	4	19	12	13	0	0	120	5	23	6	0	0	19	0	8	0
S6	9	0	5	9	13	5	10	4	13	0	176	15	24	21	5	15	0	0	191	38	0	0	0	4	0	0	8	0
S7	1	0	3	5	0	2	16	14	5	0	29	0	3	35	8	17	259	0	351	4	0	0	68	112	9	18	2	0
S8	8	1	2	10	15	2	13	5	27	11	15	37	0	4	7	18	29	0	466	0	0	0	0	4	41	0	17	0
S9	3	0	0	2	5	0	1	1	4	22	177	13	0	5	0	0	0	2	0	0	0	6	0	0	3	0	0	0
S10	0	0	0	3	15	2	5	3	28	13	50	0	2	7	1	1	0	4	0	0	12	153	2	0	10	0	1	3
S11	4	0	0	2	101	15	65	20	44	0	17	24	2	3	0	43	0	1	7	7	6	160	7	0	10	0	6	1
S12	9	3	6	6	8	2	22	10	43	11	2	36	26	7	0	14	3	2	15	6	4	29	0	33	8	0	5	0
S13	24	2	26	20	55	30	432	105	24	6	10	5	116	25	8	30	40	5	386	68	165	309	1253	132	6	0	2	1
S14	0	0	2	0	1	10	30	19	11	14	4	6	0	0	0	0	0	6	66	7	0	12	24	16	8	2	0	1
S15	2	1	3	4	10	24	80	50	81	25	47	51	0	2	1	0	23	7	49	6	194	30	80	66	17	3	3	5
